# Supplementary material for: Application of large datasets to assess trends in the stability of perovskite photovoltaics through machine learning
Source: Royal Society of Chemistry journal article supplement (doi:10.1039/d3ta05966a), 2024-01-01

**Supplementary information –**

**Application of large datasets to assess trends in the stability of perovskite photovoltaics through machine learning.**

Bashayer Nafe N Alsulami<sup>1</sup>, Tudur Wyn David<sup>2</sup>, A. Essien<sup>1</sup>, Samrana Kazim<sup>3,4</sup>, Shahzada Ahmad<sup>3,4</sup>, T. Jesper Jacobsson<sup>5</sup>, Andrew Feeney<sup>1</sup>, Jeff Kettle<sup>1</sup>

*1 James Watt School of Engineering, University of Glasgow, Glasgow, G12 8QQ, Scotland*

*2 School of Natural and Environmental Sciences, Newcastle University, Newcastle upon Tyne, NE1 7RU*

*3 BCMaterials, Basque Center for Materials, Applications, and Nanostructures, UPV/EHU Science Park, Leioa, Spain*

*4 IKERBASQUE, Basque Foundation for Science, 48009, Bilbao, Spain*

*5 Institute of Photoelectronic Thin Film Devices and Technology, Key Laboratory of Photoelectronic Thin Film Devices and Technology of Tianjin, College of Electronic Information and Optical Engineering, Nankai University, Tianjin, China*

**SI-1 Values used for data analysis**

Listed below are the factors used in the datasets. In addition to the factors listed below, numerical values of cell area and optical bandgap was added and a binary assertion of Module (as opposed to cell) and UV filter was applied (TRUE or FALSE)

| <b>Substrate</b> | <b>Front electrode</b> | <b>Back electrode</b> | <b>Architecture</b> | <b>Testing condition</b> |
|------------------|------------------------|-----------------------|---------------------|--------------------------|
| PEN              | Ag                     | Ag                    | Back contacted      | IEC 61215                |
| SLG              | Ag-grid                | Ag                    | nip                 | IEC 61646                |
| PAA-PEG          | Ag-np                  | AgAl                  | nip-mp              | Indoor light             |
| PDMS             | AZO                    | Ag-nw                 | nip-mp-carbon       | ISOS-D-1                 |
| PEN              | Cu-grid                | Al                    | pin                 | ISOS-D-1I                |
| PES              | FTO                    | Al                    |                     | ISOS-D-2                 |

|                            |           |            |              |
|----------------------------|-----------|------------|--------------|
| PET                        | Graphene  | Au         | ISOS-D-2I    |
| PI                         | ITO       | Au         | ISOS-D-3     |
| Polyester-satin<br>textile | ITO       | AZO-c      | ISOS-D-3     |
| SLG                        | IZO       | Carbon     | ISOS-L-1     |
| Ti                         | Ni        | Carbon     | ISOS-L-1     |
| Transparent wood           | PEDOT:PSS | Carbon-nt  | ISOS-L-1I    |
|                            | Ti        | CSCNT@SnO2 | ISOS-L-2     |
|                            | Au        | Cu         | ISOS-L-2I    |
|                            | Carbon-nt | Cu         | ISOS-L-3     |
|                            | FTO       | FTO        | ISOS-LC-1    |
|                            | Graphene  | Graphene   | ISOS-L-C1I   |
|                            | ITO       | Graphene   | ISOS-O-1     |
|                            | Ti        | ITO        | ISOS-T-1     |
|                            |           | ITO        | ISOS-V-1     |
|                            |           | IZO        | ISOS-V-1I    |
|                            |           | Metal      | UV-stability |
|                            |           | MWCNTs     |              |
|                            |           | Ni         |              |
|                            |           | PEDOT:PSS  |              |
|                            |           | Pt         |              |
|                            |           | Sb         |              |
|                            |           | Al         |              |
|                            |           | Carbon     |              |
|                            |           | Carbon-nt  |              |
|                            |           | Cu         |              |
|                            |           | Graphene   |              |
|                            |           | Graphite   |              |
|                            |           | Mo         |              |
|                            |           | MWCNTs     |              |

| <b>Light source</b> | <b>Bias condition</b> | <b>Atmosphere</b> |
|---------------------|-----------------------|-------------------|
| Sun                 | Constant potential    | Air               |
| Dark                | MPPT                  | Air. Desiccator   |
| Fluorescent lamp    | Open circuit          | Ambient           |
| Halogen             | Passive resistance    | Ar                |
| Indoor light        | Short circuit         | Dry air           |
| LED                 |                       | Glovebox          |
| Light               |                       | N2                |
| Mercury             |                       | N2; O2            |
| Metal halide        |                       | Near-space        |
| Natural sunlight    |                       | Unknown           |
| Solar simulator     |                       | Vacuum            |
| Sulfur plasma       |                       |                   |
| Tungsten            |                       |                   |
| UV lamp             |                       |                   |
| White LED           |                       |                   |
| Xenon               |                       |                   |

| <b>TL1</b>                       | <b>TL2</b>                         | <b>TL3</b>                       |
|----------------------------------|------------------------------------|----------------------------------|
| 2F-SAM                           | 1,2-ethanedithiol                  | 1,2 ethanedithio                 |
| 2PACz                            | 3-(1-pyridinio)-1-propanesulfonate | 5,6,11,12-Tetraphenylnaphthacene |
| 4-methoxythiophenol              | AgInS2-QDs; TiO2-c                 | Al2O3-c                          |
| 5,6,11,12-Tetraphenylnaphthacene | Ag-np                              | Al2O3-c                          |
| Ag-np                            | Al2O3-c                            | Al2O3-mp                         |
| Ag-nw                            | Al2O3-mp                           | Al2O3-np                         |
| Al-np                            | APTES-SAM                          | Aminocaproic acid                |
| Aniline; rGO                     | Au-nw                              | Aminocaproic acid; Caproic acid  |

|                                     |                                  |                                         |
|-------------------------------------|----------------------------------|-----------------------------------------|
| Au-np                               | AZO-mp                           | Au@SiO <sub>2</sub> -np                 |
| AZO-np                              | B2Cat2                           | Au-np                                   |
| BaCoF <sub>4</sub>                  | Ba(La)SnO <sub>3</sub>           | BaTiO <sub>3</sub>                      |
| BCP                                 | BBA                              | beta-Alanine-SAM                        |
| BDT-POZ                             | bis-PCBM; DMC                    | BSO-mp                                  |
| BDT-PTZ                             | BrBA                             | C <sub>60</sub>                         |
| BenMeIM-Cl                          | BZnTPP                           | C <sub>60</sub> -SAM                    |
| Bphen                               | C <sub>60</sub>                  | Carbon-QDs                              |
| BTF1                                | C <sub>60</sub>                  | Carpoic acid                            |
| BV-FNPD                             | C <sub>60</sub> -NH <sub>2</sub> | CaTiO <sub>3</sub> -c                   |
| C <sub>60</sub>                     | C <sub>60</sub> -SAM             | CBA-SAM                                 |
| C <sub>60</sub> -SAM                | C <sub>9</sub>                   | CdS                                     |
| Carbon-np                           | Carbon-QDs                       | CsI                                     |
| CdS                                 | Carbon-QDs                       | CuSCN                                   |
| CdSe                                | CDIN                             | Dex-CB-MA                               |
| CeO <sub>x</sub>                    | CdS                              | ETPM                                    |
| CF-Sp-BTh                           | C-PCBSD                          | Graphen Oxide                           |
| Cobalt-porphyrin                    | CPTA                             | Graphene oxide                          |
| CoCuO                               | CsCO <sub>3</sub>                | HOOC-Ph-SH                              |
| CoO <sub>x</sub>                    | CuGaO <sub>2</sub>               | Li-GO                                   |
| CPTA                                | CuGaO <sub>2</sub> -c            | MBA-SAM                                 |
| CrO <sub>x</sub>                    | CuGaO <sub>2</sub> -mp           | MoO <sub>3</sub>                        |
| Cu <sub>3</sub> PS <sub>4</sub> -np | CuInS <sub>2</sub> -QDs          | MoS <sub>2</sub>                        |
| CuAlO <sub>2</sub>                  | CuZnS                            | MPTS-SAM                                |
| CuCo <sub>2</sub> O <sub>4</sub>    | D35                              | N719 dye                                |
| CuCrO <sub>2</sub>                  | Dompamin-SAM                     | NaYF <sub>2</sub> @SiO <sub>2</sub> -np |
| CuI                                 | DPC60                            | NBA-SAM                                 |
| CuInS <sub>2</sub>                  | DTPA                             | NH <sub>4</sub> I                       |
| CuO <sub>x</sub>                    | EMIM-PF <sub>6</sub>             | NiO-c                                   |
| CuPc                                | EPA                              | NiO-np                                  |
| CuSCN                               | F4-TCNQ                          | PbSe                                    |

|                                          |                                              |                                 |
|------------------------------------------|----------------------------------------------|---------------------------------|
| CuS-np                                   | Graphene                                     | PbTiO <sub>3</sub>              |
| CzPAF-TPA                                | Graphene; Al <sub>2</sub> O <sub>3</sub> -mp | PCBM-60                         |
| DBFMT                                    | Graphydine-QDs                               | PCBM-60; PMMA                   |
| DBTMT                                    | Heparin-Na                                   | PCBM-60; Poly(N-vinylcarbazole) |
| DFTAB                                    | Hexamethylenetetramine                       | PEDOT:PSS                       |
| DMZ                                      | ICBA                                         | PEI                             |
| DNA-CTMA                                 | ImAcHcl                                      | PFN                             |
| F6-TCNNQ                                 | KCl                                          | SbI <sub>3</sub>                |
| FB-OMeTPA                                | LiF                                          | SiO <sub>2</sub> -mp            |
| Fe <sub>2</sub> O <sub>3</sub>           | MCA                                          | SnO <sub>2</sub>                |
| Fe <sub>2</sub> O <sub>3</sub> -mp       | MgO                                          | SnO <sub>2</sub> -c             |
| FT-OMeTPA                                | MgO-EA                                       | SnO <sub>2</sub> -np            |
| GO-nanoribbons                           | MoS <sub>2</sub>                             | TiN                             |
| Graphene                                 | MSAPBS                                       | TiO <sub>2</sub> -c             |
| Graphene oxide                           | NAMF-Br                                      | TiO <sub>2</sub> -mp            |
| Graphene; NDI; SnO <sub>2</sub> -np      | NAMF-Cl                                      | TiO <sub>2</sub> -np            |
| Graphene-QDs                             | NAMF-H                                       | Trimethylamine oxide            |
| HfO <sub>2</sub>                         | NiO-c                                        | ZrO <sub>2</sub> -mp            |
| HTM-2<br>(bifluorenylidene-based)        | NiO-mp                                       | PCBM-60                         |
| IDIC                                     | NPC60 OH                                     | PFN                             |
| In <sub>2</sub> O <sub>3</sub>           | OEABS                                        | (blank)                         |
| In <sub>2</sub> O <sub>3</sub> -c        | OTES:APTES-SAM                               |                                 |
| LiCoO <sub>2</sub>                       | PASP                                         |                                 |
| LiMgNiO-c                                | PbPc                                         |                                 |
| LiNiO-c                                  | PCBA                                         |                                 |
| MeO-2PACz                                | PCBB-2CN-2C8                                 |                                 |
| Mg <sub>0.1</sub> Zn <sub>0.9</sub> O-np | PCBM-60                                      |                                 |
| m-MTDATA                                 | PCBM-60; PMMA                                |                                 |
| MoO <sub>3</sub>                         | PCBSD:GD                                     |                                 |
| MoOx                                     | PEDOT:PSS                                    |                                 |

|                                |                    |
|--------------------------------|--------------------|
| MoS2                           | PEI                |
| MoS2                           | PFN                |
| MPA-BTTI                       | PFN-Br             |
| MSAPBS                         | PFN-P1             |
| MTDATA                         | PFN-P2             |
| N,N-di-p-methylthiophenylamine | PMMA               |
| Nafion; PEDOT:PSS              | PN4N               |
| Nb2O5                          | PolyTPD            |
| NbOx                           | PPDI-F3N           |
| NDI-P                          | PS                 |
| NiCo2O4                        | PSS-Na             |
| NiMgLiO                        | PTAA               |
| NiMgLiO-c                      | PTFTS              |
| NiMgO                          | rGO; Zn2SnO4-fiber |
| NiO                            | Rubrene            |
| NiO-c                          | SAED               |
| NiO-mp                         | Si-nw              |
| NiO-nanowalls                  | SnO2               |
| NiO-np                         | SnO2@TiO2-np       |
| NO-Graphene-QDs                | SnO2-c             |
| NPB                            | SnO2-mp            |
| NPB; PTAA                      | SnO2-nanosheets    |
| nTi-MOF                        | SnO2-np            |
| Oxo-Graphene                   | Spiro-TBB          |
| P3Ct                           | SrGO               |
| P3CT-K                         | SrTiO3-mp          |
| P3CT-N                         | SWCNTs; TiO2-mp    |
| P3CT-Na                        | SY1                |
| P3HT                           | SY2                |
| PANI                           | SY3                |

|                             |                                                  |
|-----------------------------|--------------------------------------------------|
| PASQ-IDT                    | SY4                                              |
| PB2T-O                      | TaTm                                             |
| pBDT-BODIPY                 | Ti                                               |
| PBT                         | TiO <sub>2</sub> ; CoCr-mp                       |
| PbZrTiO <sub>3</sub>        | TiO <sub>2</sub> -c                              |
| PCBM-60                     | TiO <sub>2</sub> -mp                             |
| PCP-Na                      | TiO <sub>2</sub> -mp; YVO <sub>4</sub> :Eu:Bi-np |
| PEDOT:LS                    | TiO <sub>2</sub> -nanofibers                     |
| PEDOT:PSS                   | TiO <sub>2</sub> -nanoflowers                    |
| PEDOT:PSS; PEG              | TiO <sub>2</sub> -np                             |
| PEDOT:PSS; PEI              | TiO <sub>2</sub> -nw                             |
| PEI                         | TiS <sub>2</sub>                                 |
| PEIE                        | TPI-6MEO                                         |
| PFB                         | TPTPA                                            |
| PFN                         | V <sub>2</sub> O <sub>5</sub>                    |
| PFO                         | WO <sub>x</sub>                                  |
| PhNa-1T                     | WPF-6-oxy-F                                      |
| poly(1,4-phenylenevinylene) | ZIF-8                                            |
| PolyTPD                     | Zn <sub>2</sub> SnO <sub>4</sub> -fiber          |
| Porphyrin                   | Zn <sub>2</sub> SnO <sub>4</sub> -mp             |
| p-PFP-O                     | ZnO-mp                                           |
| PTAA                        | ZnO-nanodisks                                    |
| PTB7                        | ZnO-nanofibers                                   |
| PTCA                        | ZnO-nanowells                                    |
| PTEG-1                      | ZnO-np                                           |
| PTPD                        | ZnO-nw                                           |
| PVK                         | ZnOS                                             |
| PyCEE                       | ZnP <sub>triazine</sub> (gly) <sub>2</sub>       |
| rGO                         | ZnSO <sub>4</sub> -mp                            |
| r-GO-HBS                    | ZnTiO <sub>3</sub> -mp                           |

|                                   |                      |
|-----------------------------------|----------------------|
| Si-OMeTPA                         | ZrO <sub>2</sub> -mp |
| SnO <sub>2</sub>                  | ZTO                  |
| SnO <sub>2</sub> -c               | CuPc                 |
| SnO <sub>2</sub> -nanosheets      | PEDOT:PSS            |
| SnO <sub>2</sub> -np              | PEDOT:PSS            |
| SnO <sub>2</sub> -np              | SnO <sub>2</sub> -np |
| SnO <sub>2</sub> -QDs             | ZnO                  |
| SnS <sub>2</sub>                  |                      |
| Spiro-MeOTAD                      |                      |
| Spiro-TBB                         |                      |
| SrGeO <sub>3</sub>                |                      |
| SrTiO <sub>3</sub>                |                      |
| SrTiO <sub>3</sub> -c             |                      |
| SY1                               |                      |
| SY2                               |                      |
| SY3                               |                      |
| SY4                               |                      |
| TAE                               |                      |
| TAPC                              |                      |
| TaTm                              |                      |
| TB(MA)                            |                      |
| TCl-PDI                           |                      |
| TFB                               |                      |
| TFM                               |                      |
| Ti <sub>3</sub> C <sub>2</sub>    |                      |
| Ti <sub>3</sub> C <sub>2</sub> Tx |                      |
| TiO <sub>2</sub> -c               |                      |
| TiO <sub>2</sub> -macroporous     |                      |
| TiO <sub>2</sub> -mp              |                      |
| TiO <sub>2</sub> -np              |                      |
| TiO <sub>2</sub> -nw              |                      |
| TiS <sub>2</sub>                  |                      |
| TPA-BP-OXD                        |                      |
| TPE-S                             |                      |
| TP-FTzF-TP                        |                      |
| TS-CuPc                           |                      |
| TTA                               |                      |
| V1036                             |                      |
| VB-MeO-FDPA                       |                      |
| VOx                               |                      |
| WOx                               |                      |
| WS <sub>2</sub>                   |                      |
| X1                                |                      |
| XY1                               |                      |



Zn<sub>2</sub>SnO<sub>4</sub>  
 ZnO  
 ZnO  
 ZnO-np  
 ZnSO  
 ZTO  
 SnO<sub>2</sub>-c  
 TPA-PT-C6

#### TL4

|                                                   |                             |                                       |                      |
|---------------------------------------------------|-----------------------------|---------------------------------------|----------------------|
| (4AMP)I <sub>2</sub>                              | CuInS <sub>2</sub> @ZnS-QDs | MoO <sub>2</sub> -np                  | PTTI-2               |
| (CH <sub>3</sub> ) <sub>3</sub> SPbI <sub>3</sub> | CuInS <sub>2</sub> -QDs     | MoO <sub>3</sub>                      | PTZ-TPA              |
| (DTYM-NDI-DTYA) <sub>2</sub>                      | CuInSe <sub>2</sub> -QDs    | MoS <sub>2</sub>                      | PVAc                 |
| (OctPhO) <sub>8</sub> CuPc                        | CuMe <sub>3</sub> 2c        | MoS <sub>2</sub> -QDs                 | PVP                  |
| (OctPhO) <sub>8</sub> ZnPc                        | CuMePc                      | MoS <sub>2</sub> -QDs; rGO-flakes     | Py-C                 |
| [BMMIm]Cl                                         | CuO <sub>2</sub>            | mp-SFX-2PA                            | Py-OMe               |
| [BMPA-BTD]3-TPA                                   | CuP                         |                                       | PZn-2FTPA            |
| [BMPA-EDOT]3-TPA                                  | CuPc                        | N2200                                 | Q10                  |
| [Fe(bpyPY <sub>4</sub> )](OTf) <sub>2.5</sub>     | CuPcNO <sub>2</sub> -OPh    |                                       | RCP                  |
| 18-crown-6 ether                                  | CuPc-OBu                    | NaYF <sub>4</sub> :Yb:Er-np           | RCP-BTT              |
| 1-adamantylamine                                  | CuPc-OTPA <sub>t</sub> Bu   | Nb <sub>2</sub> O <sub>5</sub>        | Red Phosphorous-QDs  |
| 1-adamantylamine hydrochloride                    | CuPrPc                      | N-CuMe <sub>2</sub> Pc                | rGO                  |
|                                                   | CuPs-TIPS                   | N-CuMe <sub>2</sub> Pc; P3HT          | rGO-4FPH             |
|                                                   | CuS                         | NDI <sub>3</sub> HU-DTYM <sub>2</sub> | rGO-flakes           |
| 2,6-Py                                            | CuSCN                       | NDI-ID                                | S,N-Heteroacene 1    |
| 2,7 BCz-OMeTAD                                    | CuSeCN                      | NDI-ID(RR)                            | S,N-Heteroacene 2    |
| 2,7-triphenylamine-carbazole                      | CW4                         | NDI-ID(RS)                            | S,Si-heteropentacene |
| 2-acetylpyridine                                  |                             | NDI-PM                                | S12                  |
| 2-aminoterephthalic acid                          | Cytop                       | NDP-V                                 | S14                  |
| 2FBTA-2                                           | Cz-OMeTAD                   | NH <sub>2</sub> -POSS                 | S5                   |
| 2-HI-PVK                                          | CzPAF-SBF                   | NiCo <sub>2</sub> O <sub>4</sub> -np  | SAF-5                |
| 2H-MoS <sub>2</sub>                               | CZ-STA; CZ-TA               | NiO                                   | SAF-OMe              |
| 2mF-X59                                           | CZ-TA                       | NiO-c                                 | Selenium             |
| 2-MP                                              | CZTPA-1                     | NiO-mp                                | SFXDAnCBZ            |
| 2PDI-OS                                           | CZTPA-2                     | NiO-np                                | SGT-405              |
| 2TPA-2-DP                                         | DAHI                        | NiPc                                  | SGT-410              |
| 2TPA-4-DP                                         | DAI                         | NMPFP                                 | SGT-411              |
| 3,6 BCz-OMeTAD                                    | DBC-OMeDPA                  | NP-SC6-TiOPc                          | SiPc-Py-2            |
| 3,6-cbz-EDOT                                      | D-C60                       | OAI                                   | Si-QDs               |
| 3,6-triphenylamine-carbazole                      | DCZ-OMeTAD                  | OCA                                   | SM                   |
| 3-acetylpyridine                                  | DCZ-OMeTPA                  | ODA-FeS <sub>2</sub> -np              | SM09                 |

|                                   |                                            |                                        |                       |
|-----------------------------------|--------------------------------------------|----------------------------------------|-----------------------|
| 3-Butylthiophene                  | DDOF                                       | OIPC-I                                 | SnO <sub>2</sub> -c   |
| 3-Dodecylthiophene                | Decaphenylcyclopentasilane                 | Oleic-acid                             | SnS                   |
| 3-Ethylthiophene                  | DEPT-SC                                    | Ome-DPA-CuPc                           | SnS-np; ZnS-np        |
| 3-Hexylthiophene                  | DERDTS-TBDT                                | OMe-TATPyr                             | SP-01                 |
| 3-hydroxypyridine                 | DFBT(DTS-FBTTh <sub>2</sub> ) <sub>2</sub> | OMeTPA-BDT                             | SP-02                 |
| 3-Methylthiophene                 | DIPO-Ph <sub>4</sub>                       | Ome-TPA-CuPc                           | SP-12                 |
|                                   | DIQ-C12                                    | OMeTPA-DPP                             | Spiro-MeOTAD          |
|                                   | dly-1                                      | OMeTPA-FA                              | Spiro-MeOTAD:P3HT     |
|                                   | dly-2                                      | OMeTPA-TPA                             | Spiro-MeTAD           |
|                                   | DM                                         | OTPA-ZnPc                              | Spiro-OBuTAD          |
|                                   | DMEC-60                                    | P(BDTS-SePPD)                          | Spiro-OEtTAD          |
| 4-acetylpyridine                  | DMEC-70                                    | P(BDTS-tPPD)                           | Spiro-OiPrTAD         |
| 4-chlorothiophenol                | DORDTS-TFBT                                | P(BDTS-ttPPD)                          | Spiro-OMeOTAD         |
| 4-DMABA                           | DPA-ANT-DPA                                | P(NDI <sub>2</sub> DT-TTCN)            | Spiro-OprTAD          |
| 4-HI-PVK                          | DPA-QA-DPA                                 | P(NDI <sub>2</sub> OD-T <sub>2</sub> ) | SrCl <sub>2</sub>     |
|                                   | DPPS                                       | P1                                     |                       |
| A101                              | DR3T                                       | P1Z1                                   | SWCNTs                |
| A102                              | DR3TBDTT                                   | P2                                     | TAPC                  |
| ACE-ANT-ACE                       | DR3TBDTT; PDMS                             | P3                                     | TaTm                  |
| ACE-QA-ACE                        | DTB                                        | P3HT                                   | TBC                   |
| ACR-TPA                           | DTBT                                       | P3HT                                   | TBC-1                 |
| ADAHCl                            | DTS                                        | P3HT; SWCNTs                           | TBC-2                 |
| ADAHI                             | EDOT-OMeTPA                                | P3HT-MoS <sub>2</sub>                  | TCPBr                 |
| Adamantane                        | EH44                                       | P3TAA-co-P3HT                          | TCPI                  |
| a-DMEC70                          | EHCz-2EtCz                                 | P4                                     | TCP-OC8               |
| Al <sub>2</sub> O <sub>3</sub>    | EHCz-3EtCz                                 | P6                                     | TCP-OH                |
| Al <sub>2</sub> O <sub>3</sub> -c | EHCz-MeFl                                  | PANI                                   | TDT-OMeTAD            |
| Alkoxy-PTEG                       | EtheneDTPA                                 | PB(NAP-Th)TBT                          | TEACl                 |
| Aminothiazolium<br>iodide         | EtheneTTPA                                 | PBDB-T                                 | TET                   |
| AQ310                             | EVA                                        | PBDT(2F)T                              | TFAP                  |
| AS37                              | F1                                         | PBDTT                                  | TFB                   |
| asy-PBTBDT                        | F16CuPc                                    | PBDTTT-CT                              | TFDIB                 |
| AZ1                               | F2                                         | PbPc                                   | Theophylline          |
| AZ2                               | F23                                        | PbS-QDs                                | Thiophene             |
| AZO-mp                            | F3                                         | PBT1-C                                 | Th-PDI                |
| B1                                | F4-TCNQ                                    | pBTT                                   | Ti                    |
| B186                              | FA-CN                                      | PBTTT-14                               | TiO <sub>2</sub> -c   |
| B2                                | FA-PDI2                                    | PC61BEH                                | TiO <sub>2</sub> -mp  |
| B3                                | FBA2                                       | PCA-1                                  | TiO <sub>2</sub> -np  |
| BAI                               | FBA3                                       | PCBB-OEG; PCBM-60                      | TiS <sub>2</sub> -np  |
| BCP                               | FDT                                        | PCBM-60                                | Titanylphthalocyanine |
| BCP; PCBM-60                      | Fe <sub>3</sub> O <sub>4</sub> -np         | PCBM-60; F8TBT                         | TMPA-Cl               |
| BDTOFMeDPA                        | FEH                                        | PCBM-60; Graphene                      | TMTA                  |
| BDT-4MeOTPA                       | F-graphene; P3HT                           | PCBM-60; ICBA                          | TOPO                  |
| BDT-C1                            | FNCA                                       | PCBM-60; PCDTBT                        | TP1                   |
| BDTS-2DPP                         | FTA2                                       | PCBM-60; Sb-Carbon-                    | TPA-3CN               |

|                   |                             |                         |                    |
|-------------------|-----------------------------|-------------------------|--------------------|
|                   |                             | nw                      |                    |
|                   |                             | PCBM-60; Zn0.8Cd0.2S-   |                    |
| BEDN              | FU7                         | np                      | TPA-ANT-TPA        |
| Benzylamine       | Fullerene-2a                | PCBM-60; ZnO-np         | TPA-BPFN-TPA       |
| BF002             | Fullerene-2b                | PCBM-70                 | TPA-BP-TPA         |
| BF003             | Fullerene-2c                | PCBM-70; PTB7-Th        | TPA-BPV-TPA        |
| Bi2Te3            | Fulleropyrrolidinium Iodide | PCDTBT                  | TPA-CN             |
| Black phosphorous | G2                          | PCDTBT1                 | TPA-Pc             |
| BMIMBF4           | Graphene                    | PCDTBTB                 | TPA-QA-TPA         |
| BP                | Graphene oxide              | PCPD2FBT:BCF            | TPA-TPM            |
| Bp-OMe            | Graphene oxide; NiO-c       | PCPDTBT                 | TPB(2-MeOTAD)      |
| BT                | Graphene; P3HT              | PCTDI                   | TPB-2-MOTPA        |
| BTBDT             | Graphene; TSHBC             | PD-10-DTTE-7            | TPD                |
| BT-BTH            | Graphene-QDs                | PDBT-co-TT              | TPD-4EtCz          |
| BTDTP             | Graphitic carbon nitride    | PDCBT                   | TPD-4MeOTPA        |
| BTF1              | H:MoO3                      | PDIN                    | TPD-4MeTPA         |
| BTPA-6            | H101                        | PDI-T                   | TPDI               |
| BTPA-TCNE         | H111                        | PDI-V                   | TPE-DPP16          |
| BTTI-C6           | H112                        | PDMS                    | TPE-DPP4           |
| C101              | H-2,5                       | PDPP3T                  | TPE-ISO4           |
| C102              | H-3,4                       | PDPPDBTE                | TPE-PDI4           |
| C12H10B2O4        | H6Bu-ZnPc                   | p-DTS(FBTTh2)2          | TPE-TPA-8A         |
| C13-FAS           | HATNASOC7-Cs                | PEA2PBI4                | TPE-W1             |
| C5-NCMA           | H-Bi                        | PEAI                    | TPE-W2             |
| C60               |                             | PEDOT                   | TPE-W4             |
| C60; C70          | HL-1                        | PEDOT:PSS               | TPFPB              |
| C60; PCBM-60      | HL-2                        | PEH-3                   | TQ1                |
| C60; PDI          | HOFP                        | PEH-8                   | TQ2                |
| C60-BPy           | HS-Ph-CN                    | PEH-9                   | Triazine-Ph-OMeTPA |
| C60-MPy           | HTM                         |                         | Triazine-Th-OMeTPA |
| C60-SAM           | HTM1                        | Pentafluorobenzenethiol | TRUX-E-T           |
| Carbon Black      | HTM-1                       | PEO                     | TSHBC              |
| Carbon black;     |                             |                         |                    |
| Graphite          | HTM-2                       | Perovskite              | TTC                |
| Carbon;           | HZ1                         | Perovskite-QD           | TTE-1              |
| Carbon; MAI       | HZ2                         | PF8-TAA                 | TTE-2              |
| Carbon-epoxy      | H-Z2                        | PFB                     | TTF1               |
| Carbon-nt         | HZ3                         | PffBT4T-2OD             | TTPA-OMeTPA        |
| Carbon-nt; P3HT   | ICBA                        | PFPDI                   | V1000              |
| Carbon-QDs        | IDF-SFXPh                   | PhCz-4MeOTPA            | V1004              |
| CAS               | IDIC                        | Phosphor-QDs            | V1012              |
| CdI2              | IDT1                        | PHPT-py                 | V1013              |
| CdSe-QDs; PCBM-60 | IDT2                        | Ph-TPA-2A               | V1021              |
| CdS-np            | IDT6CN-4F                   | Ph-TPA-4A               | V1091              |
| CdZnSe@ZnSe-QDs   | IDT6CN-TM                   | Ph-TPA-6A               | V1160              |
| CdZnSeS-QDs       | IDTC4-TPA                   | PIF8-TAA                | V1207              |
| CeOx              | IDTC6-TPA                   | PMMA                    | V1209              |
| CeOx-np           | IDT-TPA                     | PN                      | V1221              |

|                                          |                                         |                       |          |
|------------------------------------------|-----------------------------------------|-----------------------|----------|
| CGS                                      | IDTT-TPA                                | PNDI-2T               | V1225    |
| Choline chloride                         | IEICO; PBDTTT-E-T                       | PN-F25                | V873     |
| CIGGSe-np                                | IEICO-4F                                | PN-F50                | V885     |
| CIGS-np                                  | Imidazolium iodide                      | Poly(ethylene oxide)  | V886     |
| Co <sub>3</sub> O <sub>4</sub>           | In <sub>2</sub> O <sub>3</sub> -c       | Poly(TA)              | V911     |
| Co-Porphyrin                             | IPFB                                    |                       | V950     |
| Co-porphyrins                            | IT-4F                                   |                       | WO3      |
| COPV1                                    | IT-4F; PBDB-T-SF                        |                       | WT3      |
| COPV4                                    | IT-4H                                   | Polyimid              | X2       |
| COPV7                                    | IT-4M                                   | Poly-N-vinylcarbazole | X51      |
| COTT-1                                   | ITCP-M                                  | Polystyrene           | X55      |
| CPTA-E                                   | ITCPTC                                  | PolyTPD               | X61      |
| Crosslinked TCTA-BVP                     | ITCPTC-Se                               | PO-Spiro              | X62      |
| CsBiBr <sub>3</sub> -QDs                 | ITCPTC-Th                               | POSS-NH <sub>2</sub>  | XPP      |
| CSCNT@Al <sub>2</sub> O <sub>3</sub> -c  | ITIC                                    | POSS-SH               | XY1      |
| CsCuBr <sub>3</sub> -QDs                 | ITIC-Th                                 | POZ10                 | Y4       |
| Cs-oleate                                | J1                                      | POZ6-2                | YC-1     |
| CsPbBr <sub>3</sub> -np                  | J2                                      | POZ9                  | YC-2     |
| CsPbI <sub>3</sub> -np                   | J61-ITIC                                | PPDI                  | YC-3     |
| CsSnBr <sub>3</sub> -QDs                 | JK-216D                                 | PPDT2FBT              | YD2-o-C8 |
| CsSnBr <sub>2</sub> -QDs                 | JY5                                     | PPEA                  | Yih-2    |
| CsSnI <sub>3</sub> -QDs                  | JY7                                     | pPh-2MODPACz          | YK1      |
| CT1                                      | KR321                                   | PPy                   | YK2      |
| CT2                                      | LiF                                     | PPyra-ACD             | YKP03    |
| CTAB                                     | M101                                    | PPyra-TXA             | YN1      |
| Cu:NiO-np                                | M102                                    | PPyra-XA              | YN2      |
| Cu <sub>2</sub> O                        | M103                                    | PS                    | YN3      |
| Cu <sub>3</sub> SbS <sub>4</sub> -np     | M104                                    | P-SC6-TiOPc           | YT1      |
| CuCrO <sub>2</sub>                       | M3                                      | PSQ2                  | YT2      |
| CuCrO <sub>2</sub> -np                   | M3; PCBM-60                             | PT3HT                 | YT3      |
| CuEtPc                                   | M4                                      | PTA                   | Z1       |
| CuFeO <sub>2</sub> -np                   | M4; PCBM-60                             | PTAA                  | Z1011    |
| CuGaO <sub>2</sub>                       | mDPA-DBTP                               | PTAA; Spiro-MeOTAD    | Z1012    |
| CuGaO <sub>2</sub> -np                   | Me <sub>4</sub> NBr                     | PTB7                  | Z25      |
| CuI                                      | ME6Bu-ZnPc                              | PTCDA                 | Z26      |
| CuIn <sub>1.5</sub> Se <sub>3</sub> -QDs | MEH-PPV                                 | PT-DC                 | Z28      |
| CuInS                                    | Mix-DMEC70                              | PTQ10                 | Z29      |
|                                          | MnS                                     | PTTI-1                | Z30      |
|                                          | Mo(tfd-COCF <sub>3</sub> ) <sub>3</sub> |                       | Z35      |
|                                          |                                         |                       | ZnChI    |
|                                          |                                         |                       | Zn-ChL   |
|                                          |                                         |                       | ZnO      |
|                                          |                                         |                       | ZnO-c    |
|                                          |                                         |                       | ZnO-mp   |
|                                          |                                         |                       | ZnO-np   |
|                                          |                                         |                       | ZnP      |
|                                          |                                         |                       | ZnPc     |

ZnPcNO<sub>2</sub>-OPh  
ZnPy  
Zr(acac)<sub>4</sub>  
ZrO<sub>2</sub>-c  
MAI  
NiO  
NiS  
WO<sub>2</sub>-np  
WO<sub>3</sub>-np

**TL5**

[BMIM]BF<sub>4</sub>  
3-(1-pyridinio)-1-  
propanesulfonate

Al<sub>2</sub>O<sub>3</sub>

Al<sub>2</sub>O<sub>3</sub>-c

Al<sub>2</sub>O<sub>3</sub>-mp

Al<sub>2</sub>O<sub>3</sub>-np

AZO

AZO-np

B<sub>4</sub>PyMPM

BCB

BCP

bis-C<sub>60</sub>

bis-C<sub>70</sub>

Bphen

C<sub>3</sub>-CBL

C<sub>60</sub>

C<sub>60</sub>

C<sub>60</sub>; PCBM-60

C<sub>60</sub>; PhIm

C<sub>60</sub>-N

C<sub>60</sub>-SAM

**TL6**

AZO

BCP

Bi

Bphen

C<sub>60</sub>

C<sub>60</sub>-SAM

Ca

COTT-2

Cr

LiF

Mg

MoO<sub>3</sub>

MoO<sub>3</sub>

PEI

PEIE

PO-T<sub>2</sub>T

Rhodamine

101

SnO<sub>2</sub>-c

SnO<sub>2</sub>-c

Spiro-MeOTAD

TaTm

**TL7**

LiF

MoO<sub>3</sub>

SnO<sub>2</sub>-c

TPBi

ZnSnO<sub>2</sub>-c

|                |      |
|----------------|------|
| Ca             | TPBi |
| CANP           | YC-1 |
| Carbon-nt; PEI | ZTO  |
| Carbon-QDs     |      |
| CD             |      |
| CeOx           |      |
| CeOx-np        |      |
| Cr             |      |
| Cr2O3          |      |
| CsCO3          |      |
| Cu2O           |      |
| CuBuPc         |      |
| CuPc           |      |
| CuSCN          |      |
| DM             |      |
| DTAB           |      |
| DTPC13-ThTPA   |      |
| DTP-C6Th       |      |
| DTPC8-ThDTPA   |      |
| DTPC8-ThTPA    |      |
| EFGnPs-F       |      |
| F-60; bis-C60  |      |
| F6-TCNNQ; TaTm |      |
| F-C60          |      |
| Fe2O3          |      |
| F-R-COOK       |      |
| FrGO           |      |
| Graphene       |      |
| Graphene oxide |      |
| HDAC           |      |
| LiF            |      |
| Mg             |      |
| MnO3           |      |
| MnOx           |      |
| Mo             |      |
| MoO3           |      |
| MoO4           |      |
| MoOx           |      |
| MUTAB          |      |
| NiO-c          |      |
| NiO-mp         |      |
| NiO-np         |      |
| p-(F)-PO-TAZ   |      |
| P3HT           |      |
| P3HT; PMMA     |      |
| PCBC           |      |

PCBDAN  
PCBDANI  
PCBM-60  
PCBM-60; Graphene  
PCBM-60; PMMA  
PDI-Br  
PDIN  
PDINO  
PDPP4T  
PEAI  
PEDOT:PSS  
PEI  
PEIE  
PEOz  
PFN  
PFN; ZnO-np  
PFN-Br  
PFN-P2  
Phen-NaDPO  
PMMA  
PN4N  
PN6  
Polyethylimine  
PO-T2T  
PPDIN6  
PTAA  
PTCDA  
PTZ-1  
PTZ-2  
rGO  
Rhodamin 101  
Rhodamine 101  
Rubrene  
s-Bphen  
SnO2  
SnO2-c  
SnO2-np  
SnS  
SP-12  
Spiro-MeOTAD  
SWCNTs  
SWCNTs  
Ta:Wox-np  
TaTm  
TBAI  
Ti  
TiO2  
TiO2 -np

TiO2-c  
 TiO2-np  
 TIPD  
 TIPD; ZnO-np  
 TmPyPB  
 TS-CuPc  
 V2O5  
 WO3  
 WOx  
 ZnMgO  
 ZnO  
 ZnO-c  
 ZnO-np  
 ZnSe  
 Zr(acac)4  
 ZrO2  
 ZSO-np  
 level=0.15

**SI-2 Statistical tests on Figure 2**

Shown below is the T-tests undertaken for data in figure 2(a) showing the PCE values achieved from reverse bias. All values of architecture are statistically significant at risk

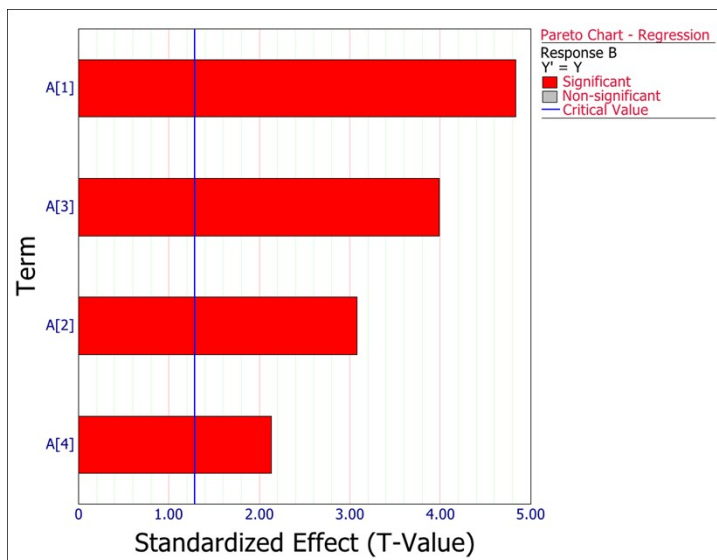

Shown below is the T-tests undertaken for data in figure 2(a) showing the T80 values achieved from reverse bias. Only the nip-carbon architecture is statistically significant at risk level=0.15



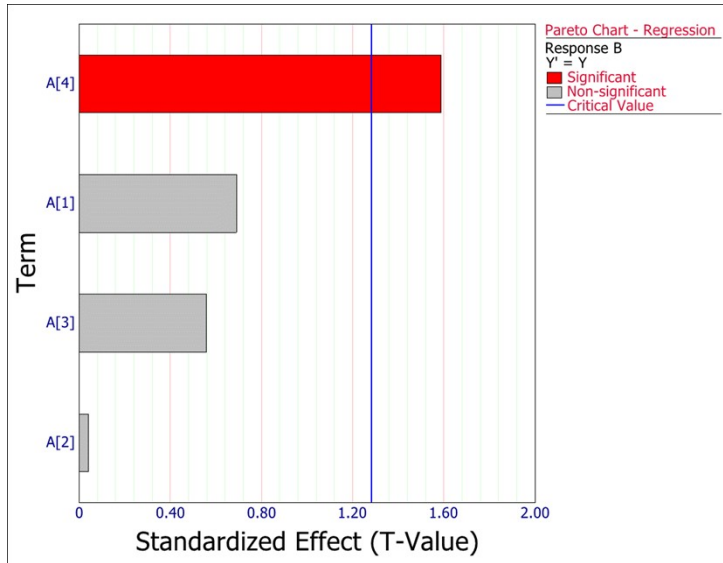

Supplement: d3ta05966a1.pdf [file d3ta05966a1.pdf]
